# Supplementary material
Source: PubMed Central journal article supplement (PMC4216471)
Supplement: rstb20130550supp3.pdf [file rstb20130550supp3.pdf]

**Supplementary Table S1: Source and primer sequences of riboprobes used to validate gene expression by whole mount *in situ* hybridization.**

| Gene Symbol          | IMAGE ID | Vector         | Primers                                                                                            |
|----------------------|----------|----------------|----------------------------------------------------------------------------------------------------|
| <i>1810019J16Rik</i> | 3599314  | pCMV-SPORT-6   | Fwd: 5'-AAGACCAGCATGGGCAGCAGCTT-3'<br>Rev: 5'-TAATACGACTCACTATAGGGAATATAGCAAGTGGGCACTGCCCACA-3'    |
| <i>B4galt6</i>       | 4037384  | pCMV-SPORT-6   | Fwd: 5'-TTGATGAAGTCCATCAGCTCTTCTCC-3'<br>Rev: 5'-TAATACGACTCACTATAGGGTTCTTCACTTCCAGTCCCAAGCAA-3'   |
| <i>Rbm47</i>         | 4240441  | pCMV-SPORT-6   | M13 forward and reverse                                                                            |
| <i>Capn6</i>         | 6517565  | pCMV-SPORT-6.1 | Fwd: 5'-AGGACAGAGGTGATCAAGGCCAA-3'<br>Rev: 5'-TAATACGACTCACTATAGGGTTTGTAAGCAGTGTGGCAAAGG-3'        |
| <i>Cldn4</i>         | 876728   | pT7T3D-PacI    | Fwd: 5'-TTTTTCGGATTGAGCTCATAACAGCC-3'<br>Rev: 5'-TAATACGACTCACTATAGGGACAAAACAAGAAACCACAGAGAAGGC-3' |
| <i>Igfbp5</i>        | 2648602  | pCMV-SPORT-6   | M13 forward and reverse                                                                            |
| <i>Rhou</i>          | 3964150  | pCMV-SPORT-6   | M13 forward and reverse                                                                            |

**Supplementary Table S2: Top 100 genes that are preferentially expressed in the foregut endoderm relative to the cranial mesoderm and ectoderm tissues.**

| Symbol               | Probe ID     | Fold change<br>mean | Selected GO biological process                   |
|----------------------|--------------|---------------------|--------------------------------------------------|
| <i>Pax9</i>          | 1442229_at   | 479.87              | organ morphogenesis                              |
| <i>Tmem27</i>        | 1435064_a_at | 100.74              | proteolysis                                      |
| <i>Masp1</i>         | 1425985_s_at | 92.72               | complement activation, lectin pathway            |
| <i>Gm10664</i>       | 1436287_at   | 80.98               | ---                                              |
| <i>T</i>             | 1419304_at   | 62.01               | mesoderm development                             |
| <i>Tmprss2</i>       | 1458347_s_at | 54.45               | proteolysis                                      |
| <i>Foxa1</i>         | 1418496_at   | 52.78               | pattern specification                            |
| <i>Afp</i>           | 1436879_x_at | 51.45               | liver development, transport                     |
| <i>Ttr</i>           | 1454608_x_at | 38.41               | transport                                        |
| <i>Spink3</i>        | 1415938_at   | 34.57               | negative regulation of peptidase activity        |
| <i>Hoxa1</i>         | 1420565_at   | 32.00               | anterior/posterior pattern specification         |
| <i>Cpm</i>           | 1429413_at   | 30.32               | proteolysis                                      |
| <i>Dpp4</i>          | 1459973_x_at | 25.12               | response to hypoxia, cell-cell adhesion          |
| <i>Tbx1</i>          | 1425779_a_at | 24.78               | pharyngeal system development                    |
| <i>Endod1</i>        | 1426541_a_at | 24.14               | phosphodiester bond hydrolysis                   |
| <i>Arg1</i>          | 1419549_at   | 24.04               | liver development                                |
| <i>Macc1</i>         | 1457044_at   | 21.32               | ---                                              |
| <i>Mpzl2</i>         | 1416236_a_at | 21.32               | cell adhesion                                    |
| <i>Cdh1</i>          | 1448261_at   | 20.68               | cell adhesion                                    |
| <i>Tbx3</i>          | 1448029_at   | 20.38               | organ morphogenesis                              |
| <i>Tgfb2</i>         | 1450923_at   | 18.56               | morphogenesis                                    |
| <i>Shh</i>           | 1436869_at   | 18.14               | pattern specification                            |
| <i>Stx3</i>          | 1425530_a_at | 17.15               | neurotransmitter transport                       |
| <i>Cldn9</i>         | 1439427_at   | 17.00               | ---                                              |
| <i>Slco4c1</i>       | 1437870_at   | 16.72               | ion transport                                    |
| <i>Foxa2</i>         | 1422833_at   | 16.07               | endoderm development                             |
| <i>1810019J16Rik</i> | 1417797_a_at | 15.93               | ---                                              |
| <i>Cldn11</i>        | 1416003_at   | 15.67               | cell adhesion                                    |
| <i>Krt18</i>         | 1448169_at   | 15.37               | tumor necrosis factor-mediated signaling pathway |
| <i>Col11a1</i>       | 1418599_at   | 15.29               | cartilage condensation                           |
| <i>Gbx2</i>          | 1420337_at   | 15.16               | tube morphogenesis                               |
| <i>St14</i>          | 1418076_at   | 15.16               | cell migration                                   |
| <i>Cldn4</i>         | 1418283_at   | 15.07               | calcium-independent cell-cell adhesion           |
| <i>Hoxb1</i>         | 1453501_at   | 14.62               | anterior/posterior pattern specification         |
| <i>Slc35f3</i>       | 1456764_at   | 14.43               | transport                                        |

Differential response of Epiblast stem cells to Nodal and Activin signalling: a paradigm of early endoderm development in the embryo. Kaufman-Francis *et al.*, (2014)

|                 |              |       |                                                                                                     |
|-----------------|--------------|-------|-----------------------------------------------------------------------------------------------------|
| <i>Crb3</i>     | 1434851_s_at | 14.41 | cell-cell junction organization                                                                     |
| <i>Dsg2</i>     | 1439476_at   | 14.13 | homophilic cell adhesion                                                                            |
| <i>Ces1d</i>    | 1435370_a_at | 13.46 | lipid catabolic process                                                                             |
| <i>Airn</i>     | 1456139_at   | 13.31 | regulation of gene expression by genetic imprinting<br>G-protein coupled receptor signaling pathway |
| <i>Kctd12b</i>  | 1442368_at   | 13.18 | pathway                                                                                             |
| <i>Gramd1b</i>  | 1435229_at   | 13.13 | ---                                                                                                 |
| <i>Limch1</i>   | 1435321_at   | 12.49 | actomyosin structure organization                                                                   |
| <i>Moxd1</i>    | 1422643_at   | 12.31 | catecholamine metabolic process                                                                     |
| <i>Tgm2</i>     | 1433428_x_at | 11.83 | blood vessel remodeling                                                                             |
| <i>Isl1</i>     | 1422720_at   | 11.65 | pharyngeal system developme                                                                         |
| <i>Met</i>      | 1434447_at   | 11.63 | liver development                                                                                   |
| <i>Rbm47</i>    | 1423411_at   | 11.26 | ---                                                                                                 |
| <i>Igfbp5</i>   | 1452114_s_at | 11.06 | regulation of cell growth                                                                           |
| <i>Socs3</i>    | 1455899_x_at | 10.85 | signal transduction                                                                                 |
| <i>Has2</i>     | 1449169_at   | 10.71 | hyaluronan biosynthetic process                                                                     |
| <i>Cldn6</i>    | 1417845_at   | 10.51 | calcium-independent cell-cell adhesion                                                              |
| <i>Frem1</i>    | 1455280_at   | 10.46 | cell adhesion                                                                                       |
| <i>Ap1s3</i>    | 1455735_at   | 10.42 | vesicle-mediated transport                                                                          |
| <i>Inadl</i>    | 1418983_at   | 10.42 | ---                                                                                                 |
| <i>Dkk3</i>     | 1448669_at   | 10.20 | Wnt receptor signaling pathway                                                                      |
| <i>Hhex</i>     | 1423319_at   | 10.09 | hepatic duct development                                                                            |
| <i>Prdm1</i>    | 1420425_at   | 10.00 | germ cell development                                                                               |
| <i>Scara3</i>   | 1427020_at   | 9.93  | ---                                                                                                 |
| <i>Id4</i>      | 1450928_at   | 9.89  | cell proliferation                                                                                  |
| <i>Nuak1</i>    | 1438684_at   | 9.74  | cell adhesion                                                                                       |
| <i>Esrp1</i>    | 1454681_at   | 9.65  | regulation of RNA splicing                                                                          |
| <i>Rnf128</i>   | 1418318_at   | 9.65  | protein ubiquitination                                                                              |
| <i>Clic6</i>    | 1454866_s_at | 9.62  | transport                                                                                           |
| <i>Plat</i>     | 1415806_at   | 9.61  | cell-cell adhesion                                                                                  |
| <i>Casr</i>     | 1449881_a_at | 9.57  | signal transduction                                                                                 |
| <i>Stx3</i>     | 1425536_at   | 9.57  | transport                                                                                           |
| <i>Nedd9</i>    | 1437132_x_at | 9.52  | cell adhesion                                                                                       |
| <i>Epcam</i>    | 1416579_a_at | 9.46  | ureteric bud development                                                                            |
| <i>Rhou</i>     | 1449028_at   | 9.46  | cytoskeleton organization                                                                           |
| <i>Ptch1</i>    | 1428853_at   | 9.33  | organ morphogenesis                                                                                 |
| <i>Fam134b</i>  | 1424683_at   | 9.23  | sensory perception of pain                                                                          |
| <i>Itga3</i>    | 1455158_at   | 9.23  | cell adhesion                                                                                       |
| <i>Sh3bgrl2</i> | 1434109_at   | 9.07  | ---                                                                                                 |
| <i>St8sia4</i>  | 1419186_a_at | 9.07  | ganglioside biosynthetic process                                                                    |
| <i>Slc16a1</i>  | 1415802_at   | 8.98  | organic anion transpor                                                                              |
| <i>Frmd4b</i>   | 1438169_a_at | 8.91  | establishment of epithelial cell polarity                                                           |
| <i>Cldn7</i>    | 1448393_at   | 8.88  | calcium-independent cell-cell adhesion                                                              |
| <i>Ctsh</i>     | 1418365_at   | 8.71  | epithelial cell migration                                                                           |
| <i>Slc39a8</i>  | 1416832_at   | 8.70  | ion transport                                                                                       |

Differential response of Epiblast stem cells to Nodal and Activin signalling: a paradigm of early endoderm development in the embryo. Kaufman-Francis *et al.*, (2014)

|                      |              |      |                                        |
|----------------------|--------------|------|----------------------------------------|
| <i>Rbp4</i>          | 1426225_at   | 8.70 | retinol transpor                       |
| <i>Ypel2</i>         | 1434277_a_at | 8.64 | ---                                    |
| <i>Endod1</i>        | 1433796_at   | 8.61 | phosphodiester bond hydrolysis         |
| <i>Akap5</i>         | 1436142_at   | 8.59 | protein targeting                      |
| <i>Dusp9</i>         | 1433845_x_at | 8.59 | inactivation of MAPK activity          |
| <i>Tuba4a</i>        | 1417373_a_at | 8.38 | microtubule-based movement             |
| <i>9930105H17Rik</i> | 1423071_x_at | 8.36 | ---                                    |
| <i>Hhip</i>          | 1455277_at   | 8.29 | smoothened signaling pathway           |
| <i>Fam107b</i>       | 1448509_at   | 8.28 | ---                                    |
| <i>Pura</i>          | 1455538_at   | 8.28 | DNA unwinding                          |
| <i>Lifr</i>          | 1454984_at   | 8.17 | organ regeneration                     |
| <i>Kitl</i>          | 1415855_at   | 8.12 | cell adhesion                          |
| <i>Sowahb</i>        | 1438408_at   | 8.12 | ---                                    |
| <i>Ctsh</i>          | 1443814_x_at | 8.12 | cell migration                         |
| <i>Plcxd1</i>        | 1437842_at   | 8.11 | lipid metabolic process                |
| <i>Rgs5</i>          | 1417466_at   | 8.08 | signal transduction                    |
| <i>Serinc5</i>       | 1433571_at   | 8.06 | lipid metabolic process                |
| <i>Rarb</i>          | 1454906_at   | 8.04 | digestive tract development            |
| <i>Etv5</i>          | 1428142_at   | 8.01 | cellular response to oxidative stress  |
| <i>Cldn8</i>         | 1449091_at   | 8.01 | calcium-independent cell-cell adhesion |
| ---                  | 1460084_at   | 7.75 | ---                                    |

---

Differential response of Epiblast stem cells to Nodal and Activin signalling: a paradigm of early endoderm development in the embryo. Kaufman-Francis *et al.*, (2014)

**Supplementary S3: Foregut gene markers sequences and annealing temperature for PCR**

| Gene             | Sequence (5'-3')              | Annealing temperature |
|------------------|-------------------------------|-----------------------|
| Capn6-F          | 5' TGCTTGTTCCAACCATGTTCCAAC   | 60°C                  |
| Capn6-R          | 5' TTGCTTGACTTTGGCAGTAGGACCA  | 60°C                  |
| Rbm47-F          | 5' TGTGACCCCTACACGTTGGCCTACT  | 60°C                  |
| Rbm47-R          | 5' TTCGATTATTTTCGGGGCTGGG     | 60°C                  |
| B4galt6-F        | 5' TTTGCAGCGAAGCTGGACAAGTACAT | 60°C                  |
| B4galt6-R        | 5' TCAATTGGAGCTAATTCTGGCATGAG | 60°C                  |
| Igfbp5-F         | 5' GAGCAACACAAAGGGAGAGCAAAGAA | 60°C                  |
| Igfbp5-R         | 5' TGAGCACAGCTGACCTCCTCCGTAT  | 60°C                  |
| Rhou-F           | 5' TACATCCCTACGGCCTTCGACAAC   | 60°C                  |
| Rhou-R           | 5' TCTTCAGGCACCGGCTTCTCTTT    | 60°C                  |
| 1810019J16Rik-F  | 5' ACTACCACCTGGATGAGCAAGACGC  | 60°C                  |
| 1810019J16Rik-R  | 5' ACACAGAGGTCCTGGTTCCTCCTCCT | 60°C                  |
| Cldn4-F          | 5' TATGGTCATCAGCATCATCGTGGGT  | 60°C                  |
| Cldn4-R          | 5' GAGTACTTGGCCGAGTAGGGCTTGT  | 60°C                  |
| $\beta$ -actin-F | 5' AGCACCCCTGTGCTGCTCA        | 60°C                  |
| $\beta$ -actin-R | 5' GTACGACCAGAGGCATACA        | 60°C                  |

Differential response of Epiblast stem cells to Nodal and Activin signalling: a paradigm of early endoderm development in the embryo. Kaufman-Francis *et al.*, (2014)

**Supplementary Table S4: Lists of genes for the heat maps shown in Figure 3: Expression profile of TGF $\beta$  signalling pathway components and response genes in the EpiSCs. Genes are listed in a top to bottom order for each heat map.**

| Figure 3 a | Figure 3 bi | Figure 3 bii | Figure 3 biii |
|------------|-------------|--------------|---------------|
| Ep300      | E2f4        | Acvr11       | Rbl1          |
| Rbl1       | Eng         | Tgfb2        | Acvr11        |
| Acvr11     | Acvr11      | Id1          | Ep300         |
| Smad6      | Rbl1        | Eng          | Eng           |
| Eng        | Ep300       | Msx2         | Smad3         |
| Acvr1      | Smad3       | Id2          | Smad5         |
| Id2        | Tgfb2       | Smad3        | Sp1           |
| Smad3      | Sp1         | Ep300        | E2f4          |
| Tgfb2      | Tgfb2       | Rbl1         | Thbs1         |
| Id1        | Thbs1       | Smad1        | Crebbp        |
| Msx2       | Smad5       | Sp1          | Smad1         |
| Sp1        | Id3         | Acvr1        | Tgfb2         |
| Smad1      | Smad1       | Crebbp       | Smad6         |
| Thbs1      | Crebbp      | Smad6        | Id2           |
| E2f4       | Msx2        | Tgfb2        | Id1           |
| Id3        | Smad6       | Id3          | Msx2          |
| Smad5      | Acvr1       | Thbs1        | Acvr1         |
| Crebbp     | Id1         | E2f4         | Id3           |
| Tgfb2      | Id2         | Smad5        | Tgfb2         |

| Figure 3 d | Figure 3 ei | Figure 3 eii | Figure 3 eiii |
|------------|-------------|--------------|---------------|
| Ephb2      | Brd2        | Tnfsf10      | Myod1         |
| Mbd1       | Gtf2i       | Atf4         | Agt           |
| Bcl2l1     | Bach1       | Bhlhe40      | Nfkbia        |
| Klf10      | Vegfa       | Klf10        | Snai1         |
| Cdkn1b     | Acta2       | Ar           | Acta2         |
| S100a8     | Cryab       | Cryab        | Atf4          |
| Atf4       | Cebpb       | Cdc6         | Gadd45b       |
| Emp1       | Ephb2       | Pthlh        | Ctnnb1        |
| Rhoa       | Serpine1    | Nfkbia       | Nfib          |
| Creb1      | Sox4        | Fn1          | Rhoa          |
| Bhlhe40    | Dnaja1      | Hmox1        | Bach1         |
| Nfkbia     | Fos         | Plg          | Creb1         |
| Ctnnb1     | Mapk8       | Mmp2         | Dnaja1        |
| Nfib       | Ifrd1       | Furin        | Furin         |
| Gadd45b    | Rara        | Ifrd1        | Ptgs2         |
| Rhob       | Mapk14      | Herpud1      | S100a8        |
| Tnfsf10    | Mmp2        | Nfib         | Sox4          |
| Herpud1    | Runx1       | Gadd45b      | Brd2          |
| Aipl1      | Shh         | Rhoa         | Map3k7        |
| Rara       | Pthlh       | Snai1        | Ppara         |
| Snail1     | Il10        | Myod1        | Gtf2i         |
| Myod1      | Bdnf        | pdgfa        | Ptk2          |
| Pdgfa      | Ppara       | Aipl1        | Shh           |
| Agt        | Map3k7      | Rhob         | Mapk14        |
| Wfs1       | Atf3        | Srebf2       | Bcl2l1        |
| Bach1      | Hey1        | Ephb2        | Mbd1          |
| Srebf2     | Myc         | Wfs1         | Cdkn1b        |
| Ptgs2      | Aipl1       | Rara         | Hes1          |
| Furin      | Hmox1       | Agt          | Rhob          |
| Rad21      | Gadd45b     | Emp1         | Atf3          |
| Ptk2       | Wfs1        | Cdkn1b       | Emp1          |
| Pthlh      | Nfib        | Ctnnb1       | Ar            |
| Plg        | Ar          | Bcl2l1       | Bhlhe40       |
| Myc        | Rhoa        | Creb1        | Cebpb         |
| Fos        | Furin       | S100a8       | Fn1           |
|            | Bhlhe40     | Ptk2         | Plg           |
|            | Gli2        | Sox4         | Rad21         |

Differential response of Epiblast stem cells to Nodal and Activin signalling: a paradigm of early endoderm development in the embryo. Kaufman-Francis *et al.*, (2014)

|          |         |          |          |
|----------|---------|----------|----------|
| Hmox1    | Myod1   | Cebpb    | Mapk8    |
| Ar       | Ctnnb1  | Gli2     | Runx1    |
| Fn1      | Klf10   | Atf3     | Mmp2     |
| Mmp2     | Creb1   | Mapk14   | Hey1     |
| Brd2     | Hes1    | Serpine1 | Il10     |
| Shh      | Nfkbia  | Mapk8    | Rara     |
| Hes1     | Rhob    | Acta2    | Tnfsf10  |
| Serpine1 | Cdkn1b  | Rad21    | Myc      |
| Acta2    | Plg     | Il10     | Gli2     |
| Vegfa    | Cdc6    | Ptgs2    | Serpine1 |
| Atf3     | Emp1    | Shh      | Srebf2   |
| Cdc6     | Agt     | Gtf2i    | Ifrd1    |
| Runx1    | Fn1     | Ppara    | Bdnf     |
| Ppara    | Snai1   | Dnaja1   | Fos      |
| Sox4     | S100a8  | Brd2     | Cdc6     |
| Hey1     | Tnfsf10 | Map3k7   | Pthlh    |
| Dnaja1   | Atf4    | Bdnf     | Vegfa    |
| Gtf2i    | Bcl2l1  | Myc      | Hmox1    |
| Mapk14   | Pdgfa   | Fos      | Klf10    |
| Mapk8    | Mbd1    | Vegfa    | Herpud1  |
| Ifrd1    | Ptgs2   | Hes1     | Wfs1     |
| Cryab    | Rad21   | Runx1    | Cryab    |
| Il10     | Ptk2    | Bach1    | Aipl1    |
| Cebpb    | Herpud1 | Hey1     | Pdgfa    |
| Map3k7   | Serbf2  | Mbd1     |          |
| Bdnf     |         |          |          |
| Gli2     |         |          |          |
